# Supplementary material
Source: MDPI journal article supplement (https://www.mdpi.com/2311-7524/7/10/375)
Supplement: s1 [file s1]

# Supplementary Materials: Metalaxyl Resistance of Phytophthora palmivora Causing Durian Diseases in Thailand

Pornprapa Kongtragoul, Koichiro Ishikawa and Hideo Ishii

|                   |                                                             |    |
|-------------------|-------------------------------------------------------------|----|
| LC510503(DF_K012) | -----cacctaaaactttccnctgaaccgt                              | 26 |
| LC510504(DF_M035) | -----cacctannactttccnctgaaccgt                              | 26 |
| LC510508(DF_S065) | -----cacctannactttccnctgaaccgn                              | 26 |
| LC510506(DF_P075) | -----cacctaaaactttccnctgaaccgt                              | 26 |
| LC510511(DF_S055) | -----ctaaaaactttccacgtgaaccgt                               | 24 |
| LC510501(D001)    | -----cacctaaaactttccacgtgaaccgt                             | 27 |
| KY475630          | tccgtaggtgaacctgcggaaggatcattaccacacctaaaactttccacgtgaaccgt | 60 |
| LC510505(DF_P027) | -----cacctaaaactttccnctgaaccgt                              | 26 |
| LC510515(DF_CH04) | -----cacctaanactttccnctgaaccgt                              | 26 |
| LC510507(DF_PA01) | -----cacctaanactttccacgtgaaccgt                             | 26 |
| LC510502(DF_M034) | -----cacctaaaactttccacgtgaaccgt                             | 26 |
| LC510510(DF_S053) | -----cacctaaaactttccacgtgaaccgt                             | 26 |
| LC510513(DF_N014) | -----cacctaaaactttccacgtgaaccgt                             | 26 |
| LC510512(DF_M050) | -----cacctaanactnn-nngtgaaccg                               | 24 |
| LC510509(DS_T026) | -----cacctannactttc-cgtgaaccg                               | 24 |
| LC510514(DS_B033) | -----cacctannactttc-cngtgaaccg                              | 24 |

\*\* \* \*

|                   |                                                              |     |
|-------------------|--------------------------------------------------------------|-----|
| LC510503(DF_K012) | atcaaaacttagttgggggtctctttcggcggcggctgctggcttcattgctggcggctg | 86  |
| LC510504(DF_M035) | atcanaacttagttgggggtctctttcggcggcggctgctggcttcattgctggcggctg | 86  |
| LC510508(DF_S065) | atcanaacttagttgggggtctctttcggcggcggctgctggcttcattgctggcggctg | 86  |
| LC510506(DF_P075) | atcaaaacttagttgggggtctctttcggcggcggctgctggcttcattgctggcggctg | 86  |
| LC510511(DF_S055) | atcaaaacttagttgggggtctctttcggcggcggctgctggcttcattgctggcggctg | 84  |
| LC510501(D001)    | atcaaaacttagttgggggtctctttcggcggcggctgctggcttcattgctggcggctg | 87  |
| KY475630          | atcaaaacttagttgggggtctctttcggcggcggctgctggcttcattgctggcggctg | 120 |
| LC510505(DF_P027) | atcaaaacttagttgggggtctctttcggcggcggctgctggcttcattgctggcggctg | 86  |
| LC510515(DF_CH04) | atcaaaacttagttgggggtctctttcggcggcggctgctggcttcattgctggcggctg | 86  |
| LC510507(DF_PA01) | atcaaaacttagttgggggtctctttcggcggcggctgctggcttcattgctggcggctg | 86  |
| LC510502(DF_M034) | atcaaaacttagttgggggtctctttcggcggcggctgctggcttcattgctggcggctg | 86  |
| LC510510(DF_S053) | atcaaaacttagttgggggtctctttcggcggcggctgctggcttcattgctggcggctg | 86  |
| LC510513(DF_N014) | atcaaaacttagttgggggtctctttcggcggcggctgctggcttcattgctggcggctg | 86  |

|                   |                                                              |     |
|-------------------|--------------------------------------------------------------|-----|
| LC510512(DF_M050) | tatcanacttagttgggggtctctttcggcggcggtgctggcttcattgctggcggctg  | 84  |
| LC510509(DS_T026) | tatcaaaccttagttgggggtctctttcggcggcggtgctggcttcattgctggcggctg | 84  |
| LC510514(DS_B033) | natcaaaccttagttgggggtctctttcggcggcggtgctggcttcattgctggcggctg | 84  |
| *****             |                                                              |     |
| LC510503(DF_K012) | ctgttgggagagctctatcatggcgagcgtttgggcttcggctgaactagtagcttttt  | 146 |
| LC510504(DF_M035) | ctgttgggagagctctatcatggcgagcgtttgggcttcggctgaactagtagcttttt  | 146 |
| LC510508(DF_S065) | ctgttgggagagctctatcatggcgagcgtttgggcttcggctgaactagtagcttttt  | 146 |
| LC510506(DF_P075) | ctgttgggagagctctatcatggcgagcgtttgggcttcggctgaactagtagcttttt  | 146 |
| LC510511(DF_S055) | ctgttgggagagctctatcatggcgagcgtttgggcttcggctgaactagtagcttttt  | 144 |
| LC510501(D001)    | ctgttgggagagctctatcatggcgagcgtttgggcttcggctgaactagtagcttttt  | 147 |
| KY475630          | ctgttgggagagctctatcatggcgagcgtttgggcttcggctgaactagtagcttttt  | 180 |
| LC510505(DF_P027) | ctgttgggagagctctatcatggcgagcgtttgggcttcggctgaactagtagcttttt  | 146 |
| LC510515(DF_CH04) | ctgttgggagagctctatcatggcgagcgtttgggcttcggctgaactagtagcttttt  | 146 |
| LC510507(DF_PA01) | ctgttgggagagctctatcatggcgagcgtttgggcttcggctgaactagtagcttttt  | 146 |
| LC510502(DF_M034) | ctgttgggagagctctatcatggcgagcgtttgggcttcggctgaactagtagcttttt  | 146 |
| LC510510(DF_S053) | ctgttgggagagctctatcatggcgagcgtttgggcttcggctgaactagtagcttttt  | 146 |
| LC510513(DF_N014) | ctgttgggagagctctatcatggcgagcgtttgggcttcggctgaactagtagcttttt  | 146 |
| LC510512(DF_M050) | ctgttgggagagctctatcatggcgagcgtttgggcttcggctgaactagtagcttttt  | 144 |
| LC510509(DS_T026) | ctgttgggagagctctatcatggcgagcgtttgggcttcggctgaactagtagcttttt  | 144 |
| LC510514(DS_B033) | ctgttgggagagctctatcatggcgagcgtttgggcttcggctgaactagtagcttttt  | 144 |
| *****             |                                                              |     |
| LC510503(DF_K012) | taaaccattctttataactgattatactgtaggacgaaagtctctgcttttaactaga   | 206 |
| LC510504(DF_M035) | taaaccattctttataactgattatactgtaggacgaaagtctctgcttttaactaga   | 206 |
| LC510508(DF_S065) | taaaccattctttataactgattatactgtaggacgaaagtctctgcttttaactaga   | 206 |
| LC510506(DF_P075) | taaaccattctttataactgattatactgtaggacgaaagtctctgcttttaactaga   | 206 |
| LC510511(DF_S055) | taaaccattctttataactgattatactgtaggga-gaaagtctctgcttttaactaga  | 203 |
| LC510501(D001)    | taaaccattctttataactgattatactgtaggacgaaagtctctgcttttaactaga   | 207 |
| KY475630          | taaaccattctttataactgattatactgtaggacgaaagtctctgcttttaactaga   | 240 |
| LC510505(DF_P027) | taaaccattctttataactgattatactgtaggacgaaagtctctgcttttaactaga   | 206 |
| LC510515(DF_CH04) | taaaccattctttataactgattatactgtaggacgaaagtctctgcttttaactaga   | 206 |
| LC510507(DF_PA01) | taaaccattctttataactgattatactgtaggacgaaagtctctgcttttaactaga   | 206 |
| LC510502(DF_M034) | taaaccattctttataactgattatactgtaggacgaaagtctctgcttttaactaga   | 206 |
| LC510510(DF_S053) | taaaccattctttataactgattatactgtaggacgaaagtctctgcttttaactaga   | 206 |
| LC510513(DF_N014) | taaaccattctttataactgattatactgtaggacgaaagtctctgcttttaactaga   | 206 |
| LC510512(DF_M050) | taaaccattctttataactgattatactgtaggacgaaagtctctgcttttaactaga   | 204 |
| LC510509(DS_T026) | taaaccattctttataactgattatactgtaggacgaaagtctctgcttttaactaga   | 204 |
| LC510514(DS_B033) | taaaccattctttataactgattatactgnaggacgaaagtctctgcttttaactaga   | 204 |

\*\*\*\*\*

|                   |                                                           |     |
|-------------------|-----------------------------------------------------------|-----|
| LC510503(DF_K012) | tagcaacttcagcagtgatgtctaggctcgacatcgatgaagaacgctgcgaactgc | 266 |
| LC510504(DF_M035) | tagcaacttcagcagtgatgtctaggctcgacatcgatgaagaacgctgcgaactgc | 266 |
| LC510508(DF_S065) | tagcaacttcagcagtgatgtctaggctcgacatcgataaagaacgctgcgaactgc | 266 |
| LC510506(DF_P075) | tagcaacttcagcagtgatgtctaggctcgacatcgatgaagaacgctgcgaactgc | 266 |
| LC510511(DF_S055) | tagcaacttcagcagtgatgtctaggctcgacatcgatgaagaacgctgcgaactgc | 263 |
| LC510501(D001)    | tagcaacttcagcagtgatgtctaggctcgacatcgatgaagaacgctgcgaactgc | 267 |
| KY475630          | tagcaacttcagcagtgatgtctaggctcgacatcgatgaagaacgctgcgaactgc | 300 |
| LC510505(DF_P027) | tagcaacttcagcagtgatgtctaggctcgacatcgatgaagaacgctgcgaactgc | 266 |
| LC510515(DF_CH04) | tagcaacttcagcagtgatgtctaggctcgacatcgatgaagaacgctgcgaactgc | 266 |
| LC510507(DF_PA01) | tagcaacttcagcagtgatgtctaggctcgacatcgatgaagaacgctgcgaactgc | 266 |
| LC510502(DF_M034) | tagcaacttcagcagtgatgtctaggctcgacatcgatgaagaacgctgcgaactgc | 266 |
| LC510510(DF_S053) | tagcaacttcagcagtgatgtctaggctcgacatcgatgaagaacgctgcgaactgc | 266 |
| LC510513(DF_N014) | tagcaacttcagcagtgatgtctaggctcgacatcgatgaagaacgctgcgaactgc | 266 |
| LC510512(DF_M050) | tagcaacttcagcagtgatgtctaggctcgacatcgataaagaacgctgcgaactgc | 264 |
| LC510509(DS_T026) | tagcaacttcagcagtgatgtctaggctcgacatcgataaagaacgctgcgaactgc | 264 |
| LC510514(DS_B033) | tagcaacttcagcagtgatgtctaggctcgacatcgataaagaacgctgcgaactgc | 264 |

\*\*\*\*\*

|                   |                                                          |     |
|-------------------|----------------------------------------------------------|-----|
| LC510503(DF_K012) | gatacgtaatgcgaattgcaggattcagtgagtcacgaaatttgaacgcattgcac | 326 |
| LC510504(DF_M035) | gatacgtaatgcgaattgcaggattcagtgagtcacgaaatttgaacgcattgcac | 326 |
| LC510508(DF_S065) | gatacgtaatgcgaattgcaggattcagtgagtcacgaaatttgaacgcattgcac | 326 |
| LC510506(DF_P075) | gatacgtaatgcgaattgcaggattcagtgagtcacgaaatttgaacgcattgcac | 326 |
| LC510511(DF_S055) | gatacgtaatgcgaattgcaggattcagtgagtcacgaaatttgaacgcattgcac | 323 |
| LC510501(D001)    | gatacgtaatgcgaattgcaggattcagtgagtcacgaaatttgaacgcattgcac | 327 |
| KY475630          | gatacgtaatgcgaattgcaggattcagtgagtcacgaaatttgaacgcattgcac | 360 |
| LC510505(DF_P027) | gatacgtaatgcgaattgcaggattcagtgagtcacgaaatttgaacgcattgcac | 326 |
| LC510515(DF_CH04) | gatacgtaatgcgaattgcaggattcagtgagtcacgaaatttgaacgcattgcac | 326 |
| LC510507(DF_PA01) | gatacgtaatgcgaattgcaggattcagtgagtcacgaaatttgaacgcattgcac | 326 |
| LC510502(DF_M034) | gatacgtaatgcgaattgcaggattcagtgagtcacgaaatttgaacgcattgcac | 326 |
| LC510510(DF_S053) | gatacgtaatgcgaattgcaggattcagtgagtcacgaaatttgaacgcattgcac | 326 |
| LC510513(DF_N014) | gatacgtaatgcgaattgcaggattcagtgagtcacgaaatttgaacgcattgcac | 326 |
| LC510512(DF_M050) | gatacgtaatgcgaattgcaggattcagtgagtcacgaaatttgaacgcattgcac | 324 |
| LC510509(DS_T026) | gatacgtaatgcgaattgcaggattcagtgagtcacgaaatttgaacgcattgcac | 324 |
| LC510514(DS_B033) | gatacgtaatgcgaattgcaggattcagtgagtcacgaaatttgaacgcattgcac | 324 |

\*\*\*\*\*

|                   |                                                              |     |
|-------------------|--------------------------------------------------------------|-----|
| LC510503(DF_K012) | ttccgggttagtcctgggagtgatgcctgtatcagtgccgtacatcaaaacttggtttct | 386 |
|-------------------|--------------------------------------------------------------|-----|

|                   |                                                             |     |
|-------------------|-------------------------------------------------------------|-----|
| LC510504(DF_M035) | ttccgggtagtcctgggagtagcctgtatcagtgccgtacatcaaacttggtttct    | 386 |
| LC510508(DF_S065) | ttccgggtagccctgggagtagcctgtatcagtgccgtacatcaaacttggtttct    | 386 |
| LC510506(DF_P075) | ttccgggtagtcctgggagtagcctgtatcagtgccgtacatcaaacttggtttct    | 386 |
| LC510511(DF_S055) | ttccgggtagtcctgggagtagcctgtatcagtgccgtacatcaaacttggtttct    | 383 |
| LC510501(D001)    | ttccgggtagtcctgggagtagcctgtatcagtgccgtacatcaaacttggtttct    | 387 |
| KY475630          | ttccgggtagtcctgggagtagcctgtatcagtgccgtacatcaaacttggtttct    | 420 |
| LC510505(DF_P027) | ttccgggtagtcctgggagtagcctgtatcagtgccgtacatcaaacttggtttct    | 386 |
| LC510515(DF_CH04) | ttccgggtagtcctgggagtagcctgtatcagtgccgtacatcaaacttggtttct    | 386 |
| LC510507(DF_PA01) | ttccgggtagtcctgggagtagcctgtatcagtgccgtacatcaaacttggtttct    | 386 |
| LC510502(DF_M034) | ttccgggtagtcctgggagtagcctgtatcagtgccgtacatcaaacttggtttct    | 386 |
| LC510510(DF_S053) | ttccgggtagtcctgggagtagcctgtatcagtgccgtacatcaaacttggtttct    | 386 |
| LC510513(DF_N014) | ttccgggtagtcctgggagtagcctgtatcagtgccgtacatcaaacttggtttct    | 386 |
| LC510512(DF_M050) | ttccgggtagtcctgggagtagcctgtatcagtgccgtacatcaaacttggtttct    | 384 |
| LC510509(DS_T026) | ttccgggtagccctgggagtagcctgtatcagtgccgtacatcaaacttggtttct    | 384 |
| LC510514(DS_B033) | ttccgggtagccctgggagtagcctgtatcagtgccgtacatcagacttggtttct    | 384 |
| *****             |                                                             |     |
| LC510503(DF_K012) | tccttccgtgtagtcgggtggatgtgccagatgtgaagtgtcttgcggctgggtctcg  | 446 |
| LC510504(DF_M035) | tccttccgtgtagtcgggtggatgtgccagatgtgaagtgtcttgcggctgggtctcg  | 446 |
| LC510508(DF_S065) | tccttccgtgtagtcgggtggatgtgccagatgtgaagtgtcttgcggctgggtctcg  | 446 |
| LC510506(DF_P075) | tccttccgtgtagtcgggtggatgtgccagatgtgaagtgtcttgcggctgggtctcg  | 446 |
| LC510511(DF_S055) | tccttccgtgtagtcgggtggatgtgccagatgtgaagtgtcttgcggctgggtctcg  | 443 |
| LC510501(D001)    | tccttccgtgtagtcgggtggatgtgccagatgtgaagtgtcttgcggctgggtctcg  | 447 |
| KY475630          | tccttccgtgtagtcgggtggatgtgccagatgtgaagtgtcttgcggctgggtctcg  | 480 |
| LC510505(DF_P027) | tccttccgtgtagtcgggtggatgtgccagatgtgaagtgtcttgcggctgggtctcg  | 446 |
| LC510515(DF_CH04) | tccttccgtgtagtcgggtggatgtgccagatgtgaagtgtcttgcggctgggtctcg  | 446 |
| LC510507(DF_PA01) | tccttccgtgtagtcgggtggatgtgccagatgtgaagtgtcttgcggctgggtctcg  | 446 |
| LC510502(DF_M034) | tccttccgtgtagtcgggtggatgtgccagatgtgaagtgtcttgcggctgggtctcg  | 446 |
| LC510510(DF_S053) | tccttccgtgtagtcgggtggatgtgccagatgtgaagtgtcttgcggctgggtctcg  | 446 |
| LC510513(DF_N014) | tccttccgtgtagtcgggtggatgtgccagatgtgaagtgtcttgcggctgggtctcg  | 446 |
| LC510512(DF_M050) | tccttccgtgtagtcgggtggatgtgccagatgtgaagtgtcttgcggctgggtctcg  | 444 |
| LC510509(DS_T026) | tccttccgtgtagtcgggtggatgtgccagatgtgaagtgtcttgcggctggcctcg   | 444 |
| LC510514(DS_B033) | tccttccgtgtaancgggtggatgtgccagatgtgaagtgtcttgcggctggcctcg   | 444 |
| *****             |                                                             |     |
| LC510503(DF_K012) | gatcggctgtgagtccttgaagtgtactgaactgtacttcttcttgcctcaaaagcgtg | 506 |
| LC510504(DF_M035) | gatcggctgtgagtccttgaagtgtactgaactgtacttcttcttgcctcaaaagcgtg | 506 |
| LC510508(DF_S065) | gatcggctgtgagtccttgaagtgtactgaactgtacttcttcttgcctcaaaagcgtg | 506 |
| LC510506(DF_P075) | gatcggctgtgagtccttgaagtgtactgaactgtacttcttcttgcctcaaaagcgtg | 506 |

|                   |                                                              |     |
|-------------------|--------------------------------------------------------------|-----|
| LC510511(DF_S055) | gatcggctgtgagtcctttgaaatgtactgaactgtacttctctttgctccaaaagcgtg | 503 |
| LC510501(D001)    | gatcggctgtgagtcctttgaaatgtactgaactgtacttctctttgctccaaaagcgtg | 507 |
| KY475630          | gatcggctgtgagtcctttgaaatgtactgaactgtacttctctttgctccaaaagcgtg | 540 |
| LC510505(DF_P027) | gatcggctgtgagtcctttgaaatgtactgaactgtacttctctttgctccaaaagcgtg | 506 |
| LC510515(DF_CH04) | gatcggctgtgagtcctttgaaatgtactgaactgtacttctctttgctccaaaagcgtg | 506 |
| LC510507(DF_PA01) | gatcggctgtgagtcctttgaaatgtactgaactgtacttctctttgctccaaaagcgtg | 506 |
| LC510502(DF_M034) | gatcggctgtgagtcctttgaaatgtactgaactgtacttctctttgctccaaaagcgtg | 506 |
| LC510510(DF_S053) | gatcggctgtgagtcctttgaaatgtactgaactgtacttctctttgctccaaaagcgtg | 506 |
| LC510513(DF_N014) | gatcggctgtgagtcctttgaaatgtactgaactgtacttctctttgctccaaaagcgtg | 506 |
| LC510512(DF_M050) | gatcggctgtgagtcctttgaaatgtactgaactgtacttctctttgctccaaaagcgtg | 504 |
| LC510509(DS_T026) | gatcgcctgtgagtcctttgaaatgtactgaactgtacttctctttgctccaaaagcgtg | 504 |
| LC510514(DS_B033) | gatcggctgtgagtcctttgaaatgtactgaactgtacttctctttgctccaaaagcgtg | 504 |

\*\*\*\*\*

|                   |                                                                |     |
|-------------------|----------------------------------------------------------------|-----|
| LC510503(DF_K012) | gcgttgctggattgtggaggctgcttgcgtagccagctcggcgaccagtttgcctgctgt   | 566 |
| LC510504(DF_M035) | gcgttgctnnattgtggaggctgcttgcgtagccagctcggcgaccagtttgcctgctgt   | 566 |
| LC510508(DF_S065) | gcgttgctgnattgtggaggctgcttgcgtagccagctcggcgaccagtttgcctgctgt   | 566 |
| LC510506(DF_P075) | gcgttgctg-attgtggaggctgcttgcgtagccagctcggcgaccagtttgcctgctgt   | 565 |
| LC510511(DF_S055) | gcgttgctg-attgtggaggctgcttgcgtagccagctcggcgaccagtttgcctgctgt   | 562 |
| LC510501(D001)    | gcgttgctg-attgtggaggctgcttgcgtagccagctcggcgaccagtttgcctgctgt   | 566 |
| KY475630          | gcgttgctg-attgtggaggctgcttgcgtagccagctcggcgaccagtttgcctgctgt   | 599 |
| LC510505(DF_P027) | gcgttgctg-attgtggaggctgcttgcgtagccagctcggcgaccagtttgcctgctgt   | 565 |
| LC510515(DF_CH04) | gcgttgctg-attgtggaggctgcttgcgtagccagctcggcgaccagtttgcctgctgt   | 565 |
| LC510507(DF_PA01) | gcgttgctg-attgtggaggctgcttgcgtagccagctcggcgaccagtttgcctgctgt   | 565 |
| LC510502(DF_M034) | gcgttgctg-attgtggaggctgcttgcgtagccagctcggcgaccagtttgcctgctgt   | 565 |
| LC510510(DF_S053) | gcgttgctg-attgtggaggctgcttgcgtagccagctcggcgaccagtttgcctgctgt   | 565 |
| LC510513(DF_N014) | gcgttgctg-attgtggaggctgcttgcgtagccagctcggcgaccagtttgcctgctgt   | 565 |
| LC510512(DF_M050) | gcgttnnnaaattgtggaggctgcttgcgtagccagctcggcgaccagtttgcctgctgt   | 564 |
| LC510509(DS_T026) | gcgttgctc-inattgtggaggctgcttgcgtagccagctcggcgaccagtttgcctgctgt | 563 |
| LC510514(DS_B033) | gcgttnn-nnattgtggaggctgcttgcgtagccagctcggcgaccagtttgcctgctgt   | 563 |

\*\*\*\*\*

|                   |                                                               |     |
|-------------------|---------------------------------------------------------------|-----|
| LC510503(DF_K012) | ggcattaatggaggagtggttcgattcgcggtatggttggcttcggctgaacagacgctta | 626 |
| LC510504(DF_M035) | ggcattaatggaggagtggttcgattcgcggtatggttggcttcggctgaacagacgctta | 626 |
| LC510508(DF_S065) | ggcattaatggaggagtggttcgattcgcggtatggttggcttcggctgaacagacgctta | 626 |
| LC510506(DF_P075) | ggcattaatggaggagtggttcgattcgcggtatggttggcttcggctgaacagacgctta | 625 |
| LC510511(DF_S055) | ggcattaatggaggagtggttcgattcgcggtatggttggcttcggctgaacagacgctta | 622 |
| LC510501(D001)    | ggcattaatggaggagtggttcgattcgcggtatggttggcttcggctgaacagacgctta | 626 |
| KY475630          | ggcattaatggaggagtggttcgattcgcggtatggttggcttcggctgaacagacgctta | 659 |

|                   |                                                               |     |
|-------------------|---------------------------------------------------------------|-----|
| LC510505(DF_P027) | ggcattaatggaggagtggttcgattcgcgggtatggttggttcggctgaacagacgctta | 625 |
| LC510515(DF_CH04) | ggcattaatggaggagtggttcgattcgcgggtatggttggttcggctgaacagacgctta | 625 |
| LC510507(DF_PA01) | ggcattaatggaggagtggttcgattcgcgggtatggttggttcggctgaacagacgctta | 625 |
| LC510502(DF_M034) | ggcattaatggaggagtggttcgattcgcgggtatggttggttcggctgaacagacgctta | 625 |
| LC510510(DF_S053) | ggcattaatggaggagtggttcgattcgcgggtatggttggttcggctgaacagacgctta | 625 |
| LC510513(DF_N014) | ggcattaatggaggagtggttcgattcgcgggtatggttggttcggctgaacagacgctta | 625 |
| LC510512(DF_M050) | ggcattaatggaggagtggttcgattcgcgggtatggttggttcggctgaacagacgctta | 624 |
| LC510509(DS_T026) | ggcattaatggaggagtggttcgattcgcgggtatggttggttcggctgaacagacgctta | 623 |
| LC510514(DS_B033) | ggcattaatggaggagtggttcgattcgcgggtatggttggttcggctgaacagacgctta | 623 |
| *****             |                                                               |     |
| LC510503(DF_K012) | ttaaataatttctcagctgtggtggtatgagttggtgaaccgtagctatgtgagcttggc  | 686 |
| LC510504(DF_M035) | ttaaataatttctcagctgtggtggtatgagttggtgaaccgtagctatgtgagcttggc  | 686 |
| LC510508(DF_S065) | ttaaataatttctcagctgtggtggtatgagttggtgaaccgtagctatgtgagcttggc  | 686 |
| LC510506(DF_P075) | ttaaataatttctcagctgtggtggtatgagttggtgaaccgtagctatgtgagcttggc  | 685 |
| LC510511(DF_S055) | ttaaataatttctcagctgtggtggtatgagttggtgaaccgtagctatgtgagcttggc  | 682 |
| LC510501(D001)    | ttaaataatttctcagctgtggtggtatgagttggtgaaccgtagctatgtgagcttggc  | 686 |
| KY475630          | ttaaataatttctcagctgtggtggtatgagttggtgaaccgtagctatgtgagcttggc  | 719 |
| LC510505(DF_P027) | ttaaataatttctcagctgtggtggtatgagttggtgaaccgtagctatgtgagcttggc  | 685 |
| LC510515(DF_CH04) | ttaaataatttctcagctgtggtggtatgagttggtgaaccgtagctatgtgagcttggc  | 685 |
| LC510507(DF_PA01) | ttaaataatttctcagctgtggtggtatgagttggtgaaccgtagctatgtgagcttggc  | 685 |
| LC510502(DF_M034) | ttaaataatttctcagctgtggtggtatgagttggtgaaccgtagctatgtgagcttggc  | 685 |
| LC510510(DF_S053) | ttaaataatttctcagctgtggtggtatgagttggtgaaccgtagctatgtgagcttggc  | 685 |
| LC510513(DF_N014) | ttaaataatttctcagctgtggtggtatgagttggtgaaccgtagctatgtgagcttggc  | 685 |
| LC510512(DF_M050) | ttaaataatttctcagctgtggtggtatgagttggtgaaccgtagctatgtgagcttggc  | 684 |
| LC510509(DS_T026) | ttaaataatttctcagctgtggtggtatgagttggtgaaccgtagctatgtgagcttggc  | 683 |
| LC510514(DS_B033) | ttaaataatttctcagctgtggtggtatgagttggtgaaccgtagctatgtgagcttggc  | 683 |
| *****             |                                                               |     |
| LC510503(DF_K012) | ttttgaattggctttgctgttgcgaagtagagtggcggttcggctgtcgagggtcgatc   | 746 |
| LC510504(DF_M035) | ttttgaattggctttgctgttgcgaagtagagtggcggttcggctgtcgagggtcgatc   | 746 |
| LC510508(DF_S065) | ttttgaattggctttgctgttgcgaagtagagtggcggttcggctgtcgagggtcgatc   | 746 |
| LC510506(DF_P075) | ttttgaattggctttgctgttgcgaagtagagtggcggttcggctgtcgagggtcgatc   | 745 |
| LC510511(DF_S055) | ttttgaattggctttgctgttgcgaagtagagtggcggttcggctgtcgagggtcgatc   | 742 |
| LC510501(D001)    | ttttgaattggctttgctgttgcgaagtagagtggcggttcggctgtcgagggtcgatc   | 746 |
| KY475630          | ttttgaattggctttgctgttgcgaagtagagtggcggttcggctgtcgagggtcgatc   | 779 |
| LC510505(DF_P027) | ttttgaattggctttgctgttgcgaagtagagtggcggttcggctgtcgagggtcgatc   | 745 |
| LC510515(DF_CH04) | ttttgaattggctttgctgttgcgaagtagagtggcggttcggctgtcgagggtcgatc   | 745 |
| LC510507(DF_PA01) | ttttgaattggctttgctgttgcgaagtagagtggcggttcggctgtcgagggtcgatc   | 745 |

|                   |                                                           |     |
|-------------------|-----------------------------------------------------------|-----|
| LC510502(DF_M034) | tttgaattggcttctgttgcgaagtagagtggcggcttcggctgtcaggggtcgatc | 745 |
| LC510510(DF_S053) | tttgaattggcttctgttgcgaagtagagtggcggcttcggctgtcaggggtcgatc | 745 |
| LC510513(DF_N014) | tttgaattggcttctgttgcgaagtagagtggcggcttcggctgtcaggggtcgatc | 745 |
| LC510512(DF_M050) | tttgaattggcttctgttgcgaagtagagtggcggcttcggctgtcaggggtcgatc | 744 |
| LC510509(DS_T026) | tttgaattggcttctgttgcgaagtagagtggcggcttcggctgtcaggggtcgatc | 743 |
| LC510514(DS_B033) | tttgaattggcttctgttgcgaagtagagtggcggcttcggctgtcaggggtcgatc | 743 |

\*\*\*\*\*

|                   |                                                            |     |
|-------------------|------------------------------------------------------------|-----|
| LC510503(DF_K012) | catttgggaacttggtatgcttcggcatgcatctcaattggacctgatacaggcaa-- | 804 |
| LC510504(DF_M035) | catttgggaacttggtatgcttcggcatgcatctcaattggacctgatacangcaaga | 806 |
| LC510508(DF_S065) | catttgggaacttggtatgcttcggcatgcatctcaattgnacctgatacaggcaaga | 806 |
| LC510506(DF_P075) | catttgggaacttggtatgcttcggcatgcatctcnntgg-acctgatacaggcaaga | 804 |
| LC510511(DF_S055) | catttgggaacttggtatgcttcggcatgcatctcaattggacctgatacaggcaaga | 802 |
| LC510501(D001)    | catttgggaacttggtatgcttcggcatgcatctcaattggacctgatacaggcaaga | 806 |
| KY475630          | catttgggaacttggtatgcttcggcatgcatctcaattggacctgatacaggcaaga | 839 |
| LC510505(DF_P027) | catttgggaacttggtatgcttcggcatgcatctcaattggacctgatacaggcaaga | 805 |
| LC510515(DF_CH04) | catttgggaacttggtatgcttcggcatgcatctcaattggacctgatacaggcaaga | 805 |
| LC510507(DF_PA01) | catttgggaacttggtatgcttcggcatgcatctcaattggacctgatacaggcaaga | 805 |
| LC510502(DF_M034) | catttgggaacttggtatgcttcggcatgcatctcaattggacctgatacaggcaaga | 805 |
| LC510510(DF_S053) | catttgggaacttggtatgcttcggcatgcatctcaattggacctgatacaggcaaga | 805 |
| LC510513(DF_N014) | catttgggaacttggtatgcttcggcatgcatctcaattggacctgatacaggcaaga | 805 |
| LC510512(DF_M050) | catttgggaacttggtatgcttcggcatgcatctcaattggacctgatacaggcaana | 804 |
| LC510509(DS_T026) | catttgggaacttggtatgcttcggcatgcatctcaattggacctgatacaggcaaga | 803 |
| LC510514(DS_B033) | catttgggaacttggtatgcttcggcatgcatctcaattgnacctgatacaggcaaga | 803 |

\*\*\*\*\* \* \* \*\*\*\*\* \*

|                   |                                      |     |
|-------------------|--------------------------------------|-----|
| LC510503(DF_K012) | -----                                | 804 |
| LC510504(DF_M035) | ttaccgctgactt-----                   | 820 |
| LC510508(DF_S065) | ttaccgctgactta-----                  | 821 |
| LC510506(DF_P075) | ttaccgctgacttaa-----                 | 820 |
| LC510511(DF_S055) | ttaccgctgaacttaagc-----              | 821 |
| LC510501(D001)    | ttaccgctgaacttaagcatatca-----        | 831 |
| KY475630          | ttaccgctgaacttaagcatatcaataagcggagga | 876 |
| LC510505(DF_P027) | ttaccgctgactt-----                   | 819 |
| LC510515(DF_CH04) | ttaccgctgaactt-----                  | 820 |
| LC510507(DF_PA01) | ttaccgctgaacttaagcatat-----          | 828 |
| LC510502(DF_M034) | ttaccgctgaacttaagca-----             | 825 |
| LC510510(DF_S053) | ttaccgctgaacttaa-----                | 822 |
| LC510513(DF_N014) | ttaccgctgaacttaagc-----              | 824 |

|                   |                      |     |
|-------------------|----------------------|-----|
| LC510512(DF_M050) | ttaccgct-----        | 813 |
| LC510509(DS_T026) | ttaccgctgaactaa----- | 820 |
| LC510514(DS_B033) | ttaccgctgaact-----   | 818 |

**Figure S1.** Multiple sequence alignments of rDNA-ITS regions in *Phytophthora palmivora* isolates analyzed in this study. The accession number and isolate code are shown in the left of the column.
